# Supplementary material
Source: Springer Nature journal article supplement (https://www.springermedizin.de/resource/supplementary/12936_2013_3025_MOESM3_ESM.pdf/9544848)
Supplement: MOESM3 [file 9544848]

Additional file 3: Logistic regression model for bendiocarb resistance

|                       | B      | S.E. | Wald   | df | Sig. | Exp(B) | 95% C.I. for EXP(B) |        |
|-----------------------|--------|------|--------|----|------|--------|---------------------|--------|
|                       |        |      |        |    |      |        | Lower               | Upper  |
| Species               | -.651  | .508 | 1.642  | 1  | .200 | .522   | .193                | 1.412  |
| Genotype              | -4.258 | .624 | 46.634 | 1  | .000 | .014   | .004                | .048   |
| Species x<br>Genotype | 1.843  | .820 | 5.050  | 1  | .025 | 6.318  | 1.266               | 31.538 |
| Constant              | .245   | .223 | 1.213  | 1  | .271 | 1.278  |                     |        |
